# Supplementary material for: Ni-Cu Nanoparticles and Their Feasibility for Magnetic Hyperthermia
Source: PubMed Central journal article supplement (PMC7599664; doi:10.3390/nano10101988), 2020-10-09
Supplement: nanomaterials-10-01988-s001.pdf [file nanomaterials-10-01988-s001.pdf]

# Ni-Cu Nanoparticles and Their Feasibility for Magnetic Hyperthermia

Bianca P. Meneses-Brassea <sup>1</sup>, Edgar A. Borrego <sup>2</sup>, Dawn S. Blazer <sup>1</sup>, Mohamed F. Sanad <sup>1</sup>, Shirin Pourmiri <sup>3</sup>, Denisse A. Gutierrez <sup>2</sup>, Armando Varela-Ramirez <sup>2</sup>, George C. Hadjipanayis <sup>3</sup> and Ahmed A. El-Gendy <sup>1,\*</sup>

<sup>1</sup> Department of Physics, the University of Texas at El Paso (UTEP), El Paso, TX 79968, USA; bmenesesbr@miners.utep.edu (B.P.M.-B.); dsblazer@miners.utep.edu (D.S.B.); mfsanad@miners.utep.edu (M.F.S.)

<sup>2</sup> Department of Biological Sciences, Border Biomedical Research Center, the University of Texas at El Paso, El Paso, TX 79968, USA; eaborregopu@miners.utep.edu (E.A.B.); dagutierrez5@utep.edu (D.A.G.); avarela2@utep.edu (A.V.-R.)

<sup>3</sup> Department of Physics and Astronomy, University of Delaware, Newark, DE 19716, USA; pourmiri@udel.edu (S.P.); hadji@udel.edu (G.C.H.)

\* Correspondence: aelgendy@utep.edu

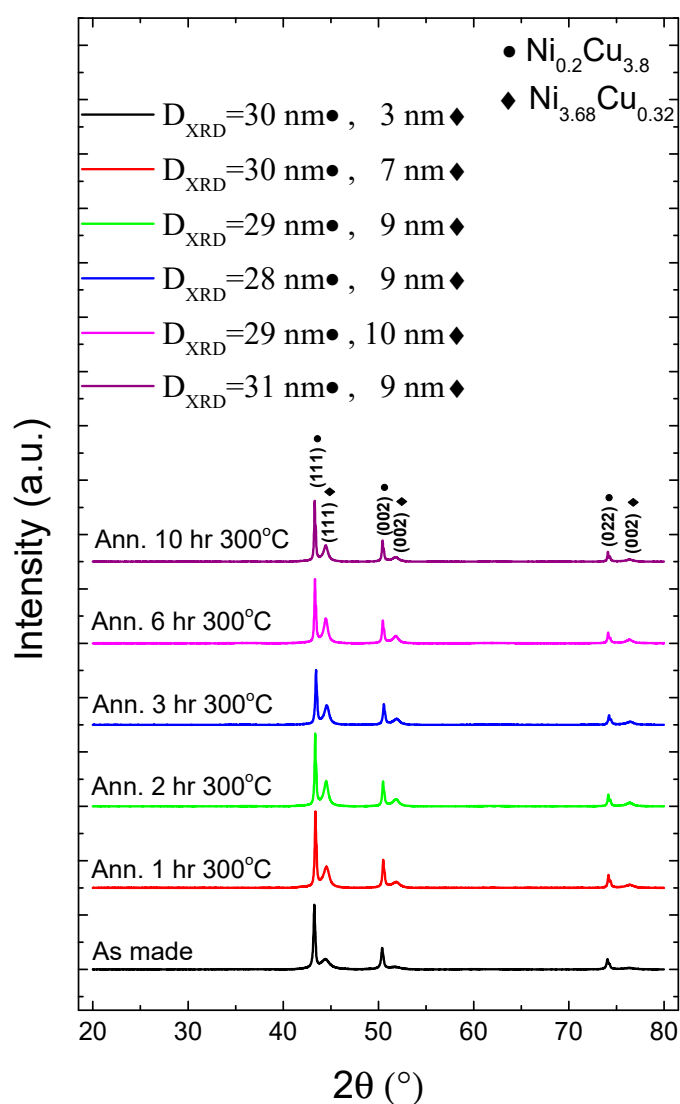

**Figure S1.** XRD pattern and crystallite size of Ni-Cu nanoclusters for as made and annealed at 300 °C for 1 hr, 2 hr, 3 hr, 6 hr, and 10 hr.

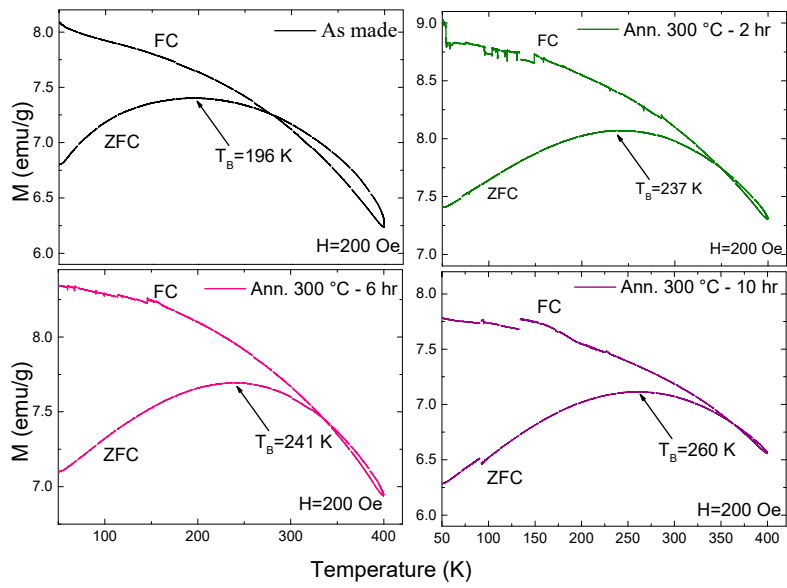

**Figure S2.** Magnetization dependence on temperature ( $M \times T$ ) at  $H=200$  Oe for as made and annealed Ni-Cu nanoclusters at  $300^\circ\text{C}$  for 1, 2, 6, 10 hr.

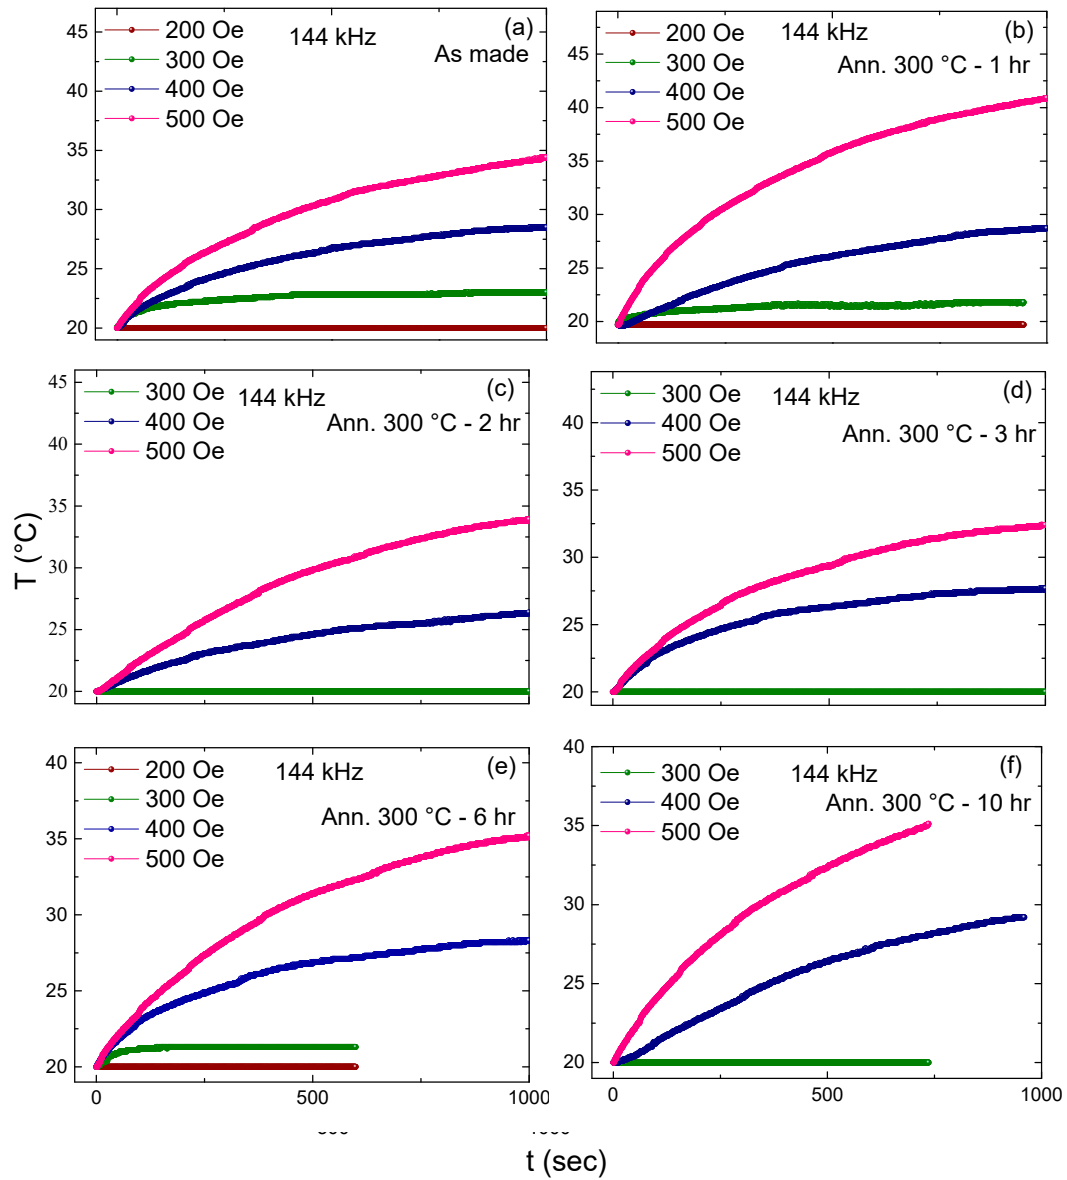

**Figure S3.** Temperature vs Time at different AC magnetic fields at 144 kHz for samples (a) as made, annealed at 300 °C for b) 1, c) 2, d) 3, e) 6, and f) 10 hr.

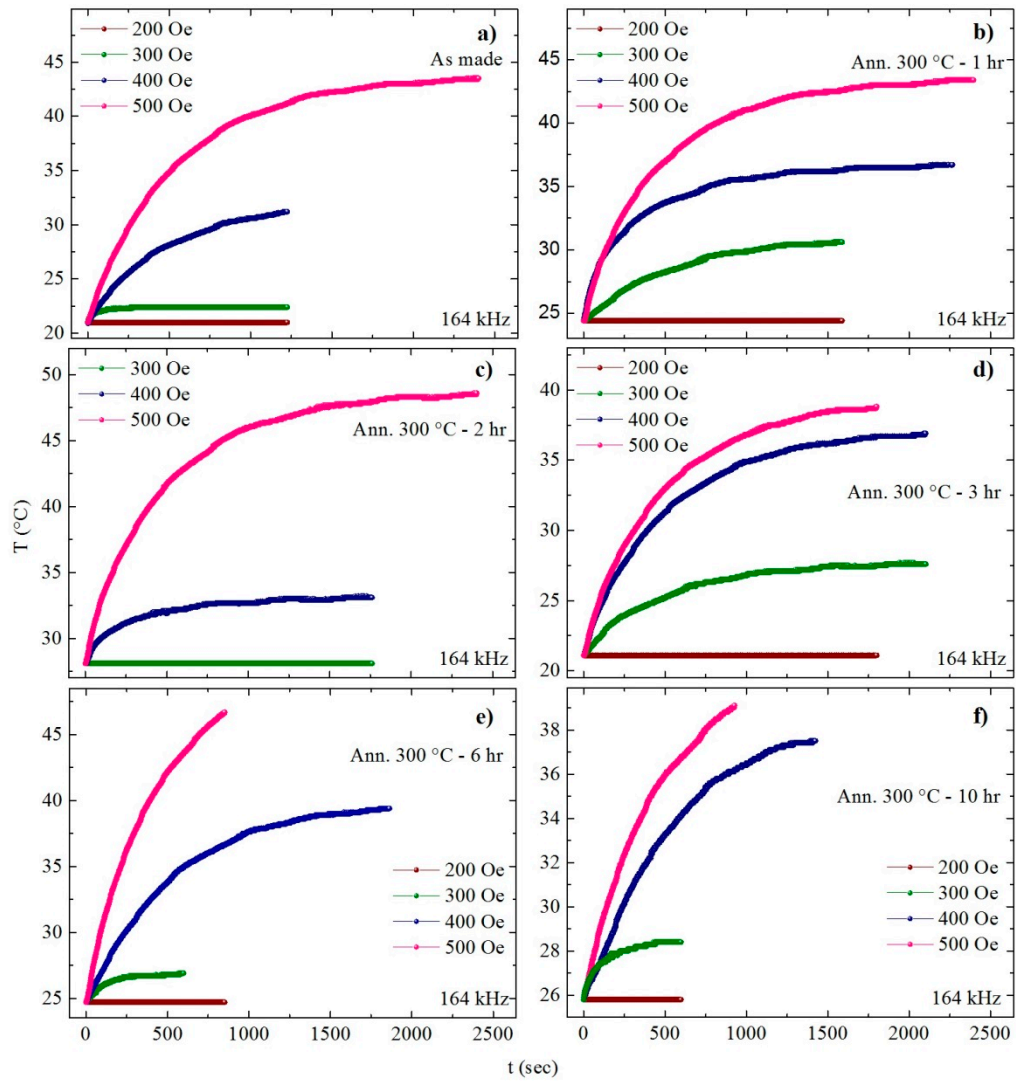

**Figure S4.** Temperature vs Time at different AC magnetic fields at 164 kHz for samples (a) as made, annealed at 300 °C for b) 1, c) 2, d) 3, e) 6, and f) 10 hr.

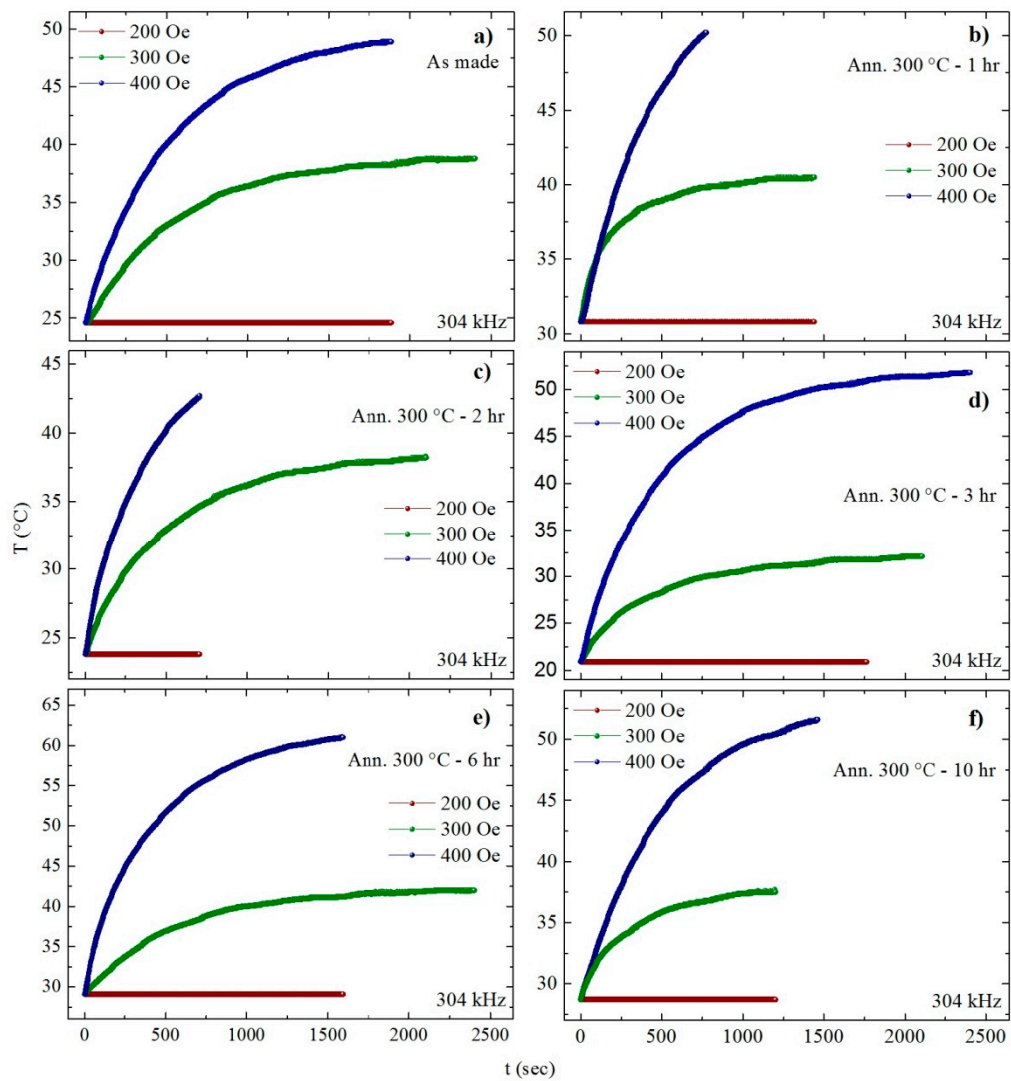

**Figure S5.** Temperature vs Time at different AC magnetic fields at 304 kHz for samples (a) as made, annealed at 300  $^{\circ}\text{C}$  for b) 1, c) 2, d) 3, e) 6, and f) 10 hr.

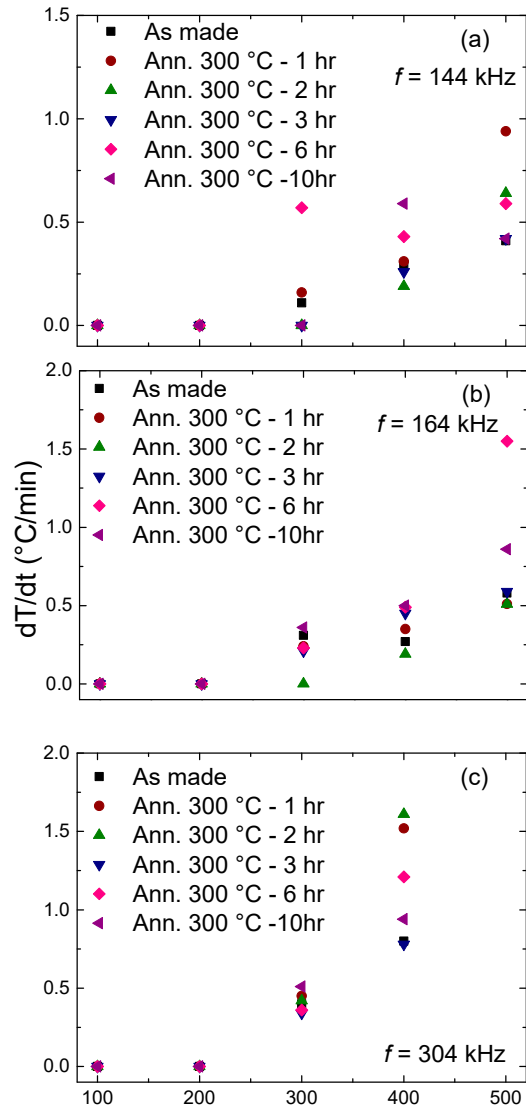

**Figure S6.** Change in heating rate dependence on applied AC magnetic fields  $H$  of Ni-Cu nanoclusters for as made and annealed samples at 300  $^{\circ}\text{C}$ . at different frequencies  $f$  for (a) 144 kHz, (b) 164 kHz, and (c) 304 kHz.
